# Supplementary material
Source: PubMed Central journal article supplement (PMC2706962)
Supplement: mmc1.pdf [file mmc1.pdf]

Supplemental Data

**WNT10A Mutations Are a Frequent Cause  
of a Broad Spectrum of Ectodermal Dysplasias  
with Sex-Biased Manifestation Pattern in Heterozygotes**

Axel Bohring, Thomas Stamm, Christiane Spaich, Claudia Haase, Kerstin Spree, Ute Hehr, Mandy Hoffmann, Susanne Ledig, Saadetin Sel, Peter Wieacker, and Albrecht Röpke

**Figure S1. Distribution of Previously Known and Recently Identified Mutations  
within the WNT10A Gene**

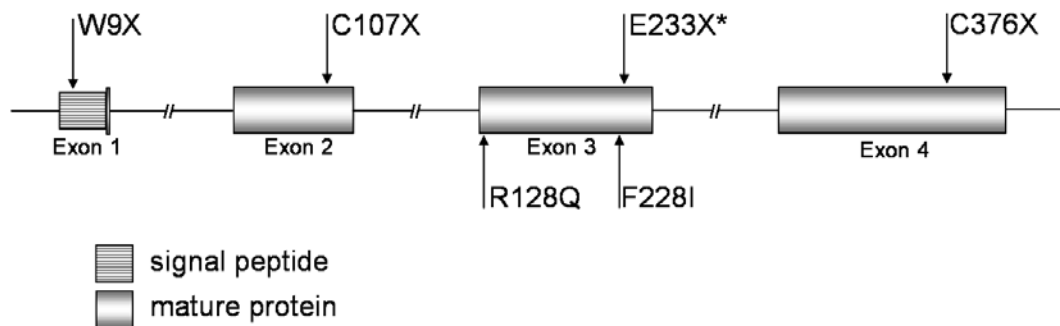

Previously known mutation is marked by an asterisk (see ref. 1).

**Figure S2. Evolutionary Conservation of *WNT10A* p.128R and p.228F Amino Acids**

|                   | R128Q                                                                                  | F228I                                        |
|-------------------|----------------------------------------------------------------------------------------|----------------------------------------------|
| Homo sapiens      | ...YESPIFSRGR <b>RESAFAY</b> AIAA...MGFGERFSK <b>DFLDS</b> REPHRDI...                  | ...MGFGERFSK <b>DFLDS</b> REPHRDI...         |
| Pan troglodytes   | ...YESPIFSRGR <b>RESAFAY</b> AIAA...MGFGERFSK <b>DFLDS</b> REPHRDI...                  | ...MGFGERFSK <b>DFLDS</b> REPHRDI...         |
| Macaca mulatto    | ...YESPIFSRGR <b>RESAFAY</b> AIAA...MGFGERFSK <b>DFLDS</b> REPHRDI...                  | ...MGFGERFSK <b>DFLDS</b> REPHRDI...         |
| Rattus norvegicus | ...YESPIFSRGR <b>RESAFAY</b> AIAA...VGFG <b>ERFSK</b> <b>DFLDS</b> REPHRDI...          | ...VGFG <b>ERFSK</b> <b>DFLDS</b> REPHRDI... |
| Mus musculus      | ...YESPIFSRGR <b>RESAFAY</b> AIAA...VGFG <b>ERFSK</b> <b>DFLDS</b> REPHRDI...          | ...VGFG <b>ERFSK</b> <b>DFLDS</b> REPHRDI... |
| Canis lupus       | ...YESPIFSRGR <b>RESAFAY</b> AIAA...VGFG <b>ERFSK</b> <b>DFLDS</b> REPHRDI...          | ...VGFG <b>ERFSK</b> <b>DFLDS</b> REPHRDI... |
| Gallus gallus     | ...YES <b>II</b> FSRGR <b>RESAFAY</b> AIAA...VDYGE <b>KFSK</b> <b>DFLDS</b> RETYRDI... | ...VDYGE <b>KFSK</b> <b>DFLDS</b> RETYRDI... |
| Xenopus laevis    | ...YDSAVFSRGR <b>RESAYVY</b> AIAA...VEYGERFS <b>KEFLDS</b> RELFRDI...                  | ...VEYGERFS <b>KEFLDS</b> RELFRDI...         |
| D.melanogaster    | ...HAS <b>LLK</b> KG <b>YRESAF</b> AFAISA...MDFG <b>VEYSK</b> <b>FLDC</b> REKAGDI...   | ...MDFG <b>VEYSK</b> <b>FLDC</b> REKAGDI...  |

NCBI Protein Database: <http://www.ncbi.nlm.nih.gov/protein/> (for Homo sapiens [NP\_079492.2], Pan troglodytes [XP\_516098.2], Macaca mulatto [XP\_001095740.1], Rattus norvegicus [NP\_001101697.1], Mus musculus [NP\_033544.1], Canis lupus [XP\_545648.2], Gallus gallus [NP\_001006590.1], Xenopus laevis [NP\_001092186.1], and D. melanogaster [NP\_609109.2]).

**Figure S3. Symptoms in Patients with *WNT10A* Associated Ectodermal Dysplasia**

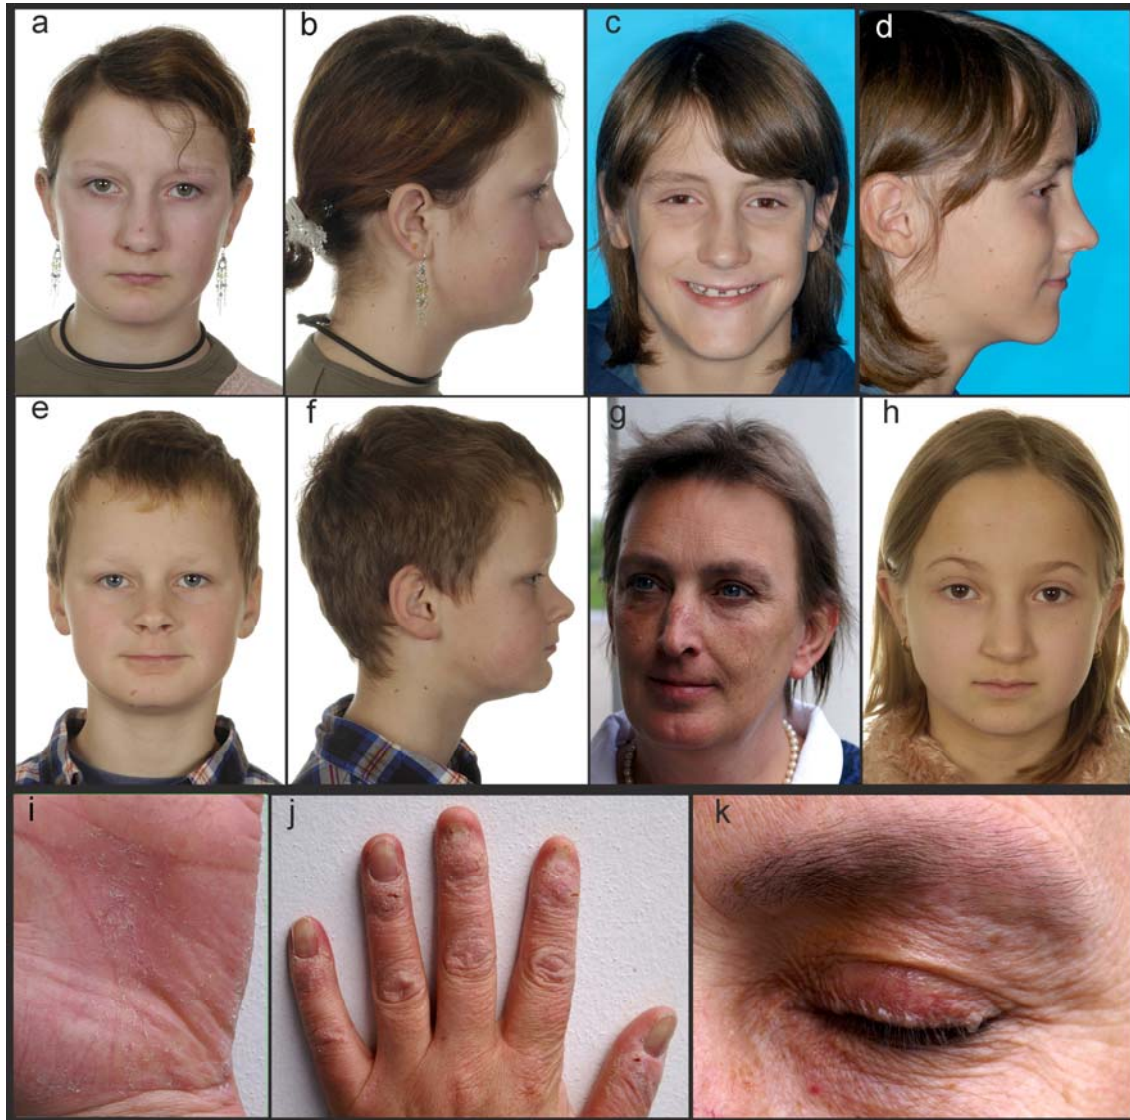

Facial phenotype in five patients (**a-h**). Note variability concerning hypotrichosis, sparse eyebrows, and facial skin erythema. Palmar hyperkeratosis (**i**) can be mild and nails may be differently affected in the same patient (**j**). Numerous cysts along eyelid margins (**k**) are a typical finding in Schöpf-Schulz-Passarge syndrome.

**Figure S4. Dental and Oral Findings in Patients with *WNT10A* Associated Ectodermal Dysplasia**

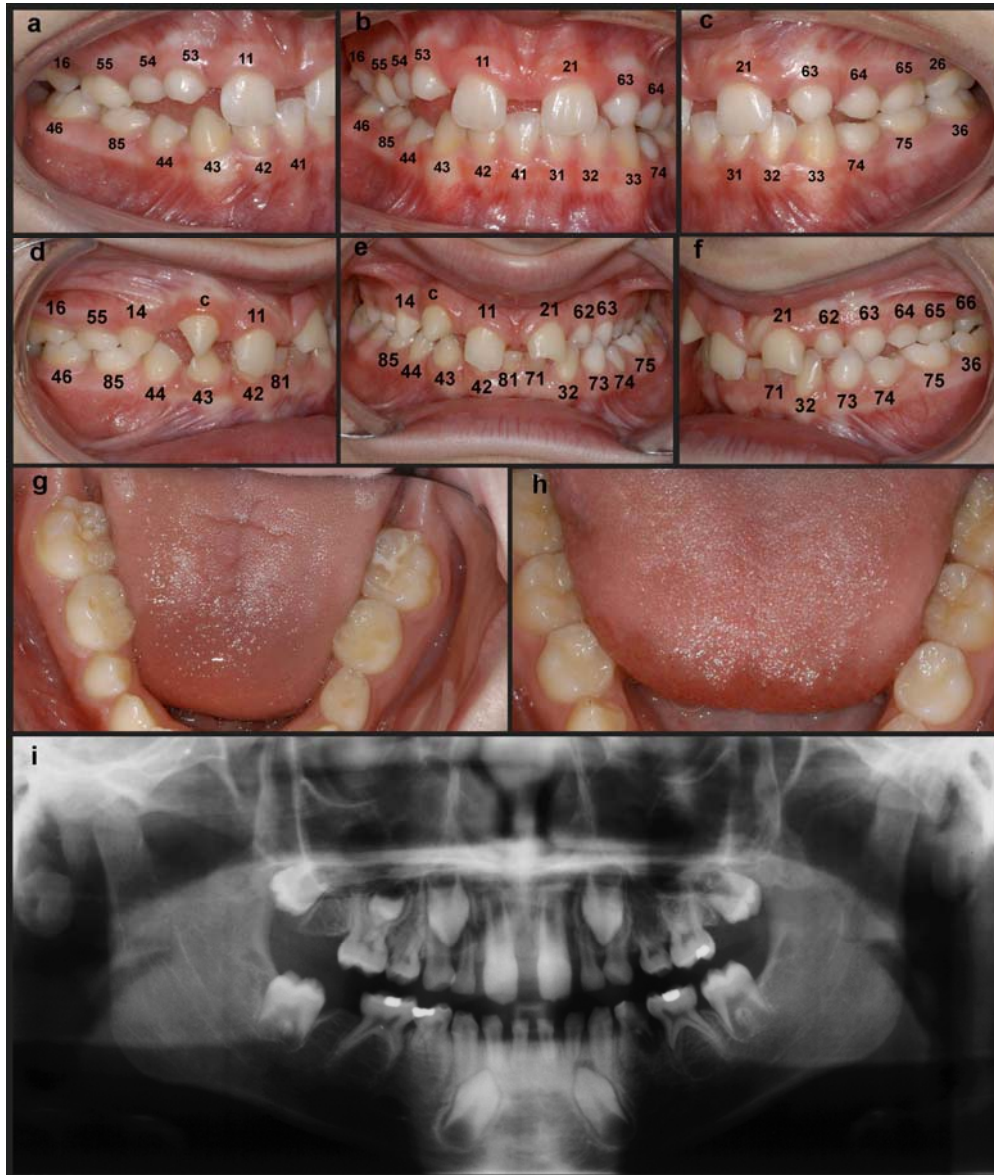

Dentition of patient 7 (a-c) at age 12 years and patient 12 (d-f) at age 12 years. Teeth are marked with an identity number (FDI Two-Digit Notation). In this two-digit numbering, the first number represents a tooth's quadrant (1 = upper right, 2 = upper left, 3 = lower left, and 4 = lower right). The second number represents the number of the tooth from the midline of the face (1 = central incisor, 2 = lateral incisor, 3 = canine, 4 = first premolar, 5 = second premolar, 6 = first molar, 7 = second molar, 8 = wisdom tooth). For deciduous teeth, the system varies slightly, the quadrants are numbered from 5 to 8 (5 = upper right, 6 = upper left, 7 = lower left, and 8 = lower right). In patient 12, the identity of a conical permanent tooth (c) cannot be determined. The tongues (g,h) show reduced filiform and fungiform papillae. Panoramic radiograph (i) of patient 8 at age eight years shows severe oligodontia concerning the permanent teeth (upper right quadrant with 17, 55, 54, 53, 52, 11, and permanent tooth germs of the second premolar and canine, upper left quadrant with 21, 62, 63, 64, 65, 26, and permanent canine tooth germ, lower left and right quadrant with complete deciduous dentition and permanent first molars as well as tooth germs of both permanent canines).

**Table S1. Primer Sequences and PCR Conditions**

| Primer   | Forward sequence         | Reverse sequence     | Amplified Segment | Annealing temperature |
|----------|--------------------------|----------------------|-------------------|-----------------------|
| Exon 1   | gagtcggagctgtgtgctg      | gagctcactgcctttggtg  | 385               | 60°C                  |
| Exon 2   | ccgttgggacagagtgtgtg     | cagcttgaggcagtggttag | 441               | 62°C                  |
| Exon 3   | gggcttcagttctccttgg      | agcaacgtggtcctcagaag | 570               | 60°C                  |
| Exon 4-1 | gggagtgggttcagaagcag     | ctggcgcaggatgtttgtg  | 493               | 56°C                  |
| Exon 4-2 | cctggtctacttcgaaaagtctcc | acagaagtgagtgggggttc | 452               | 58°C                  |

**Table S2. Mutational Analysis in Control DNA Samples**

| DNA Modification | Exon | Predicted Relevance            | Analyzed Controls by |                         |            | Chromosomes with |              | Frequency |
|------------------|------|--------------------------------|----------------------|-------------------------|------------|------------------|--------------|-----------|
|                  |      |                                | Mutation Restriction | High Resolution Melting | Sequencing | Wildtype         | Substitution |           |
| c.27G>A          | 1    | pathogenic                     | 194                  | -                       | -          | 388              | -            | Unknown   |
| c.321C>A         | 2    | pathogenic                     | 160                  | -                       | -          | 320              | -            | Unknown   |
| c.383G>A         | 3    | pathogenic                     | 132                  | -                       | 96         | 456              | -            | Unknown   |
| c.493G>A         | 3    | SNP [ss131007345] <sup>#</sup> | -                    | 121                     | 96         | 431              | 3            | ~0.7%     |
| c.682T>A         | 3    | pathogenic                     | -                    | 102                     | 96         | 394              | 2            | ~0.5%     |
| c.1128C>A        | 4    | pathogenic                     | -                    | -                       | 103        | 206              | -            | Unknown   |

<sup>#</sup> = refSNP ID [dbSNP Database]

**Table S3. Restriction Endonucleases and HRM Primer Pairs**

| DNA Modification | Exon | Restriction Endonuclease /<br>HRM Primer Pairs |
|------------------|------|------------------------------------------------|
| c.27G>A          | 1    | BsaXI                                          |
| c.321C>A         | 2    | BclI                                           |
| c.383G>A         | 3    | Hpy188I                                        |
| c.493G>A         | 3    | ccgtgtccaatgcgtgtg<br>gcagggctgggtgtcc         |
| c.682T>A         | 3    | ccagccctgcccacag<br>tctcacctgcctccaactc        |
| c.1128C>A        | 4    | gccgacctggttactctg<br>cagacgctgaccactcg        |

## **Supplemental Reference**

1. Adaimy, L., Chouery, E., Mégarbané, H., Mroueh, S., Delague, V., Nicolas, E., Belguith, H., de Mazancourt, P., and Mégarbané, A. (2007). Mutation in *WNT10A* is associated with an autosomal recessive ectodermal dysplasia: the odonto-onycho-dermal dysplasia. *Am. J. Hum. Genet.* 81, 821–828.
